# Supplementary material for: Two centuries of oceanographic data in the Indonesian Seas and surroundings: historical patterns of data availability, gaps, and future challenges
Source: Copernicus journal article supplement (doi:10.5194/essd-17-7203-2025), 2025-12-16
Supplement: Supplementary file [file essd-17-7203-2025-supplement-title-page.pdf › essd-17-7203-2025-supplement-title-page.pdf]

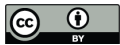

## *Supplement of*

# **Two centuries of oceanographic data in the Indonesian Seas and surroundings: historical patterns of data availability, gaps, and future challenges**

**Noir P. Purba et al.**

*Correspondence to:* Noir P. Purba (noir.purba@unpad.ac.id) and Wang Zheng (wangzheng@qdio.ac.cn)

- [essd-17-7203-2025-supplement-title-page.pdf](#)
- [Supplementary Material.xlsx](#)

The copyright of individual parts of the supplement might differ from the article licence.
